# Supplementary material for: Infective endocarditis at a tertiary care hospital in South Korea
Source: PubMed Central journal article supplement — Heart. 2020 Oct 8;107(2):135–41. doi: 10.1136/heartjnl-2020-317265 (PMC7788257; doi:10.1136/heartjnl-2020-317265), 2020-10-08
Supplement: heartjnl-2020-317265supp001.pdf [file heartjnl-2020-317265supp001.pdf]

**Table S1.** Causative microorganisms of infective endocarditis

|                                         | <b>Total<br/>(N=419)</b> | <b>(%)</b> |
|-----------------------------------------|--------------------------|------------|
| <i>Streptococcus</i> species            | 147                      | 35.1       |
| <i>Staphylococcus aureus</i>            |                          |            |
| MSSA                                    | 37                       | 8.8        |
| MRSA                                    | 29                       | 6.9        |
| <i>Enterococcus</i> species             | 36                       | 8.6        |
| Coagulase negative staphylococci        | 32                       | 7.6        |
| Gram negative bacilli except HACEK      | 11                       | 2.6        |
| Candida species                         | 4                        | 1.0        |
| HACEK                                   | 2                        | 0.5        |
| Others                                  | 11                       | 2.6        |
| Culture negative infective endocarditis | 110                      | 26.3       |

MSSA: methicillin susceptible *Staphylococcus aureus*; MRSA: methicillin resistant *Staphylococcus aureus*; HACEK: *Haemophilus* species, *Aggregatibacter* species, *Cardiobacterium hominis*, *Eikenella corrodens*, and *Kingella* species

**Table S2.** Univariate analysis for in-hospital mortality of infective endocarditis

|                                      | Patients who survived<br>(N=358) | Patients who died<br>(N=61) | p-value             |
|--------------------------------------|----------------------------------|-----------------------------|---------------------|
| <b>Demographics</b>                  |                                  |                             |                     |
| Age, years                           | 54.0 (40.5 - 66.0)               | 68.0 (54.0 - 72.0)          | <0.001 <sup>#</sup> |
| Age ≥ 65                             | 103 (28.8)                       | 35 (57.4)                   | <0.001 <sup>*</sup> |
| Male sex                             | 236 (65.9)                       | 39 (63.9)                   | 0.973 <sup>*</sup>  |
| Nosocomial infection                 | 64 (17.9)                        | 27 (44.3)                   | <0.001 <sup>*</sup> |
| <b>Comorbidities</b>                 |                                  |                             |                     |
| Previous infective endocarditis      | 16 (4.5)                         | 5 (8.2)                     | 0.217 <sup>+</sup>  |
| Previous valve surgery               | 68 (19.0)                        | 15 (24.6)                   | 0.311 <sup>*</sup>  |
| Cardiac device                       | 16 (4.5)                         | 3 (4.9)                     | 0.747 <sup>+</sup>  |
| Diabetes                             | 56 (15.6)                        | 21 (34.4)                   | <0.001 <sup>*</sup> |
| Congestive heart failure             | 18 (5.0)                         | 11 (18.0)                   | <0.001 <sup>*</sup> |
| Chronic pulmonary disease            | 2 (0.6)                          | 1 (1.6)                     | 0.378 <sup>+</sup>  |
| Renal disease                        | 25 (7.0)                         | 18 (29.5)                   | <0.001 <sup>*</sup> |
| Liver disease                        | 20 (5.6)                         | 7 (11.5)                    | 0.085 <sup>*</sup>  |
| Haemodialysis                        | 12 (3.4)                         | 11 (18)                     | <0.001 <sup>*</sup> |
| Cancer                               | 41 (11.5)                        | 13 (21.3)                   | 0.034 <sup>*</sup>  |
| Haematologic malignancy              | 4 (1.1)                          | 1 (1.6)                     | 0.547 <sup>+</sup>  |
| Transplantation                      | 1 (0.3)                          | 0 (0.0)                     | >0.999 <sup>+</sup> |
| Connective tissue disease            | 12 (3.4)                         | 3 (4.9)                     | 0.467 <sup>+</sup>  |
| Immunosuppressive therapy            | 14 (3.9)                         | 4 (6.6)                     | 0.314 <sup>+</sup>  |
| Chemotherapy within 30 days          | 11 (3.1)                         | 4 (6.6)                     | 0.251 <sup>+</sup>  |
| Antibiotics treatment within 30 days | 52 (14.5)                        | 22 (36.1)                   | <0.001 <sup>*</sup> |
| Central venous catheter access       | 23 (6.4)                         | 9 (14.8)                    | 0.024 <sup>*</sup>  |
| <b>Clinical symptoms and signs</b>   |                                  |                             |                     |
| Fever                                | 265 (74)                         | 45 (73.8)                   | 0.967 <sup>*</sup>  |
| Left ventricular dysfunction         | 118 (33.0)                       | 23 (37.7)                   | 0.469 <sup>*</sup>  |
| Sepsis including septic shock        | 247 (69.0)                       | 47 (77.0)                   | 0.204 <sup>*</sup>  |
| Neurologic complications             | 102 (28.5)                       | 27 (44.3)                   | 0.014 <sup>*</sup>  |
| Peripheral embolic complications     | 27 (7.5)                         | 8 (13.1)                    | 0.146 <sup>*</sup>  |
| Signs of peripheral vasculitis       | 8 (2.2)                          | 1 (1.6)                     | >0.999 <sup>+</sup> |
| Definite diagnosis                   | 277 (77.4)                       | 49 (80.3)                   | 0.608 <sup>*</sup>  |
| <b>Laboratory findings</b>           |                                  |                             |                     |
| Segmented neutrophil, %              | 78.5 (69.3 - 84.8)               | 85.3 (76.2 - 90.0)          | <0.001 <sup>#</sup> |
| Red blood cell distribution width, % | 14.2 (13.3 - 15.5)               | 15.1 (13.9 - 16.4)          | 0.004 <sup>#</sup>  |
| Hemoglobin, g/dL                     | 11.0 (9.7 - 12.4)                | 9.8 (8.8 - 11.0)            | <0.001 <sup>#</sup> |
| Platelet count, 10 <sup>3</sup> /uL  | 211 (145 - 295)                  | 173 (88 - 212)              | <0.001 <sup>#</sup> |
| BUN, mg/dL                           | 14.6 (10.9 - 21.6)               | 28.4 (16.4 - 41.0)          | <0.001 <sup>#</sup> |
| Creatinine, mg/dL                    | 0.9 (0.7 - 1.1)                  | 1.3 (0.9 - 2.9)             | 0.011 <sup>#</sup>  |
| Albumin, g/dL                        | 3.4 (2.9 - 3.8)                  | 2.8 (2.5 - 3.1)             | <0.001 <sup>#</sup> |
| Total bilirubin, mg/dL               | 0.6 (0.4 - 0.9)                  | 0.8 (0.5 - 1.3)             | 0.004 <sup>#</sup>  |
| C-reactive protein, mg/L             | 42.6 (9.2 - 88.3)                | 49.9 (14.5 - 113.5)         | 0.128 <sup>#</sup>  |
| SOFA score                           | 1.0 (1.0 - 2.0)                  | 3.0 (1.0 - 4.5)             | <0.001 <sup>#</sup> |
| APACHE II score                      | 6.0 (3.0 - 8.0)                  | 9.0 (7.0 - 11.5)            | <0.001 <sup>#</sup> |
| Charlson comorbidity index           | 2.0 (0.0 - 4.0)                  | 4.0 (2.0 - 8.0)             | <0.001 <sup>#</sup> |
| <b>Affected valve</b>                |                                  |                             |                     |
| Prosthetic valve                     | 50 (14.0)                        | 13 (21.3)                   | 0.138 <sup>*</sup>  |
| Aortic valve                         | 144 (40.2)                       | 37 (60.7)                   | 0.003 <sup>*</sup>  |

|                                    |                   |                  |                     |
|------------------------------------|-------------------|------------------|---------------------|
| Mitral valve                       | 224 (62.6)        | 33 (54.1)        | 0.209*              |
| Tricuspid valve                    | 27 (7.5)          | 7 (11.5)         | 0.298*              |
| Pulmonary valve                    | 15 (4.2)          | 1 (1.6)          | 0.486 <sup>+</sup>  |
| Multiple valve                     | 54 (15.1)         | 16 (26.2)        | 0.031*              |
| <b>Microorganisms</b>              |                   |                  |                     |
| Culture positivity                 | 261 (72.9)        | 48 (78.7)        | 0.288*              |
| Coagulase negative staphylococci   | 25 (7.0)          | 7 (11.5)         | 0.222*              |
| <i>Staphylococcus aureus</i>       | 48 (13.4)         | 18 (29.5)        | 0.001*              |
| MSSA                               | 28 (7.8)          | 9 (14.8)         | 0.078*              |
| MRSA                               | 20 (5.6)          | 9 (14.8)         | 0.009*              |
| <i>Enterococcus</i> species        | 30 (8.4)          | 6 (9.8)          | 0.920*              |
| <i>Streptococcus</i> species       | 134 (37.4)        | 13 (21.3)        | 0.018*              |
| HACEK                              | 2 (0.6)           | 0 (0.0)          | >0.999 <sup>+</sup> |
| Gram negative bacilli except HACEK | 10 (2.8)          | 1 (1.6)          | 0.703 <sup>+</sup>  |
| Candida species                    | 2 (0.6)           | 2 (3.3)          | 0.103 <sup>+</sup>  |
| <b>Surgery performed</b>           | <b>254 (70.9)</b> | <b>20 (32.8)</b> | <b>&lt;0.001*</b>   |

SOFA: sequential organ failure assessment; APACHE: acute physiology and chronic health evaluation; LVEDD: left ventricular end-diastolic diameter; LVESD: left ventricular end-systolic diameter; MSSA: methicillin susceptible *Staphylococcus aureus*; MRSA: methicillin resistant *Staphylococcus aureus*; HACEK: *Haemophilus* species, *Aggregatibacter* species, *Cardiobacterium hominis*, *Eikenella corrodens*, and *Kingella* species

Data are presented as median (interquartile range) or number (%) of patients, unless otherwise indicated.

# Mann-Whitney U-test

\*  $\chi^2$  test

<sup>+</sup> Fisher's exact test

**Table S3.** Multivariable logistic regression analysis\* to identify independent risk factors for in-hospital mortality of infective endocarditis

|                              | Multivariable analysis |         |
|------------------------------|------------------------|---------|
|                              | OR (95% CI)            | p-value |
| Surgery performed            | 0.25 (0.13–0.50)       | <0.001  |
| Aortic valve                 | 3.18 (1.63–6.19)       | 0.001   |
| <i>Staphylococcus aureus</i> | 2.32 (1.11–4.85)       | 0.026   |
| Neurologic complications     | 1.98 (1.07–3.69)       | 0.031   |
| SOFA score                   | 1.22 (1.03–1.45)       | 0.023   |
| Charlson comorbidity index   | 1.11 (1.02–1.22)       | 0.019   |
| Nosocomial infection         | 1.59 (0.79–3.22)       | 0.196   |

CI: confidence interval; OR: odds ratio; SOFA: sequential organ failure assessment

\* Analysis after checking interaction effect between surgery performed and Charlson comorbidity index or SOFA score
