# Supplementary material for: Infective endocarditis at a tertiary care hospital in South Korea
Source: PubMed Central journal article supplement — Heart. 2020 Oct 8;107(2):135–41. doi: 10.1136/heartjnl-2020-317265 (PMC7788257; doi:10.1136/heartjnl-2020-317265), 2020-10-08
Supplement: heartjnl-2020-317265supp002.pdf [file heartjnl-2020-317265supp002.pdf]

### Supplementary Figure Legends

**Figure S1.** Trends in the proportion of patients undergoing surgery for infective endocarditis over time by Poisson log-linear regression. Trends are depicted as green dashed lines. There was no difference in the proportion of patients undergoing surgery over time (IRR 1.01; 95% CI, 0.97–1.05;  $p = 0.688$ ).

**Figure S2.** Trends in the median age of patients with infective endocarditis over time by Poisson log-linear regression. Trends are depicted as green dashed lines. The median patient age tended to increase over time, although not statistically significant (IRR 1.01; 95% CI, 0.99–1.03;  $p=0.570$ ).

### Graphical Abstract Legend

Graphical abstract of the trends in the incidence and mortality rate of infective endocarditis, as well as the causative microorganisms and factors associated with in-hospital mortality, in South Korea.

CNS, Coagulase-negative staphylococci; MSSA, methicillin-susceptible *Staphylococcus aureus*; MRSA, methicillin-resistant *S. aureus*; GNB, Gram-negative bacilli; AUC, area under the curve; SOFA, sequential organ failure assessment
