# Supplementary material for: Infective endocarditis at a tertiary care hospital in South Korea
Source: PubMed Central journal article supplement — Heart. 2020 Oct 8;107(2):135–41. doi: 10.1136/heartjnl-2020-317265 (PMC7788257; doi:10.1136/heartjnl-2020-317265), 2020-10-08
Supplement: heartjnl-2020-317265supp005.pdf [file heartjnl-2020-317265supp005.pdf]

# 12-year retrospective observation for 419 patients with infective endocarditis

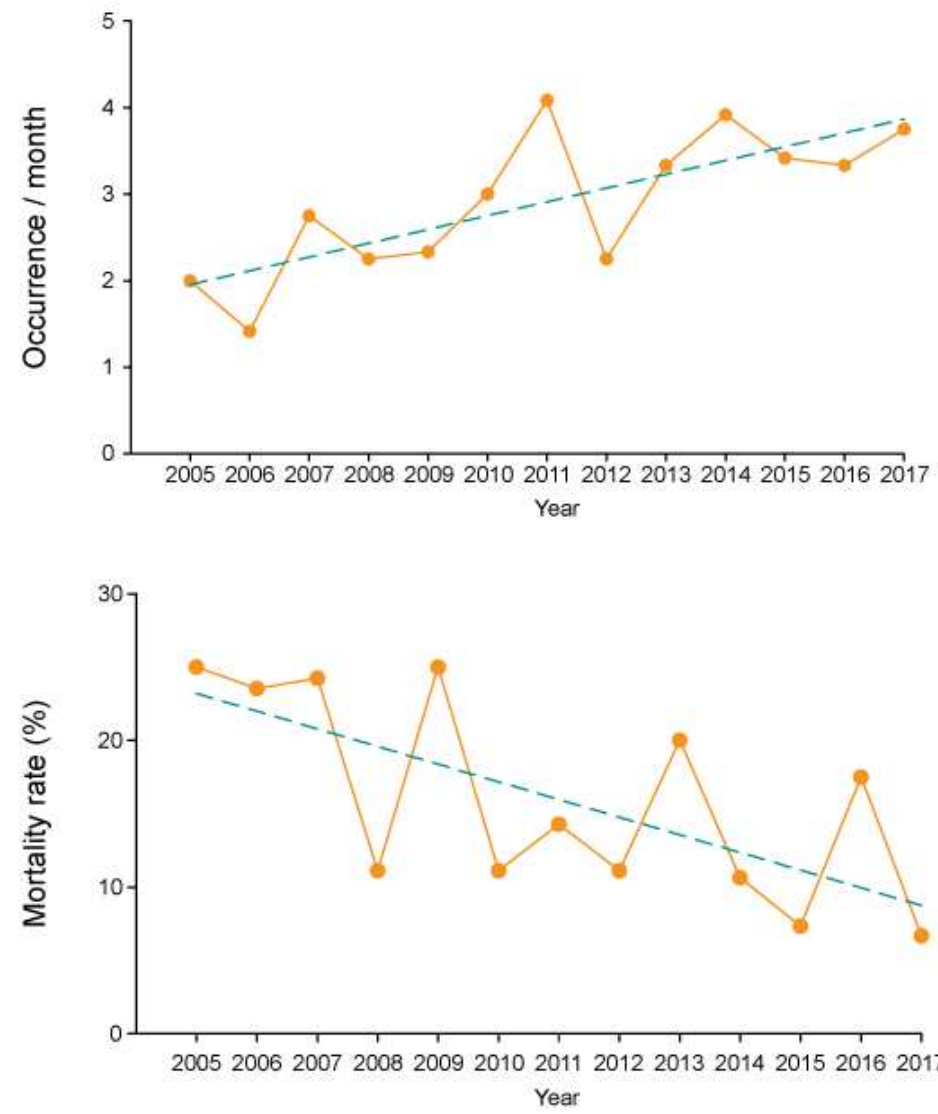

Incidence 

Mortality 

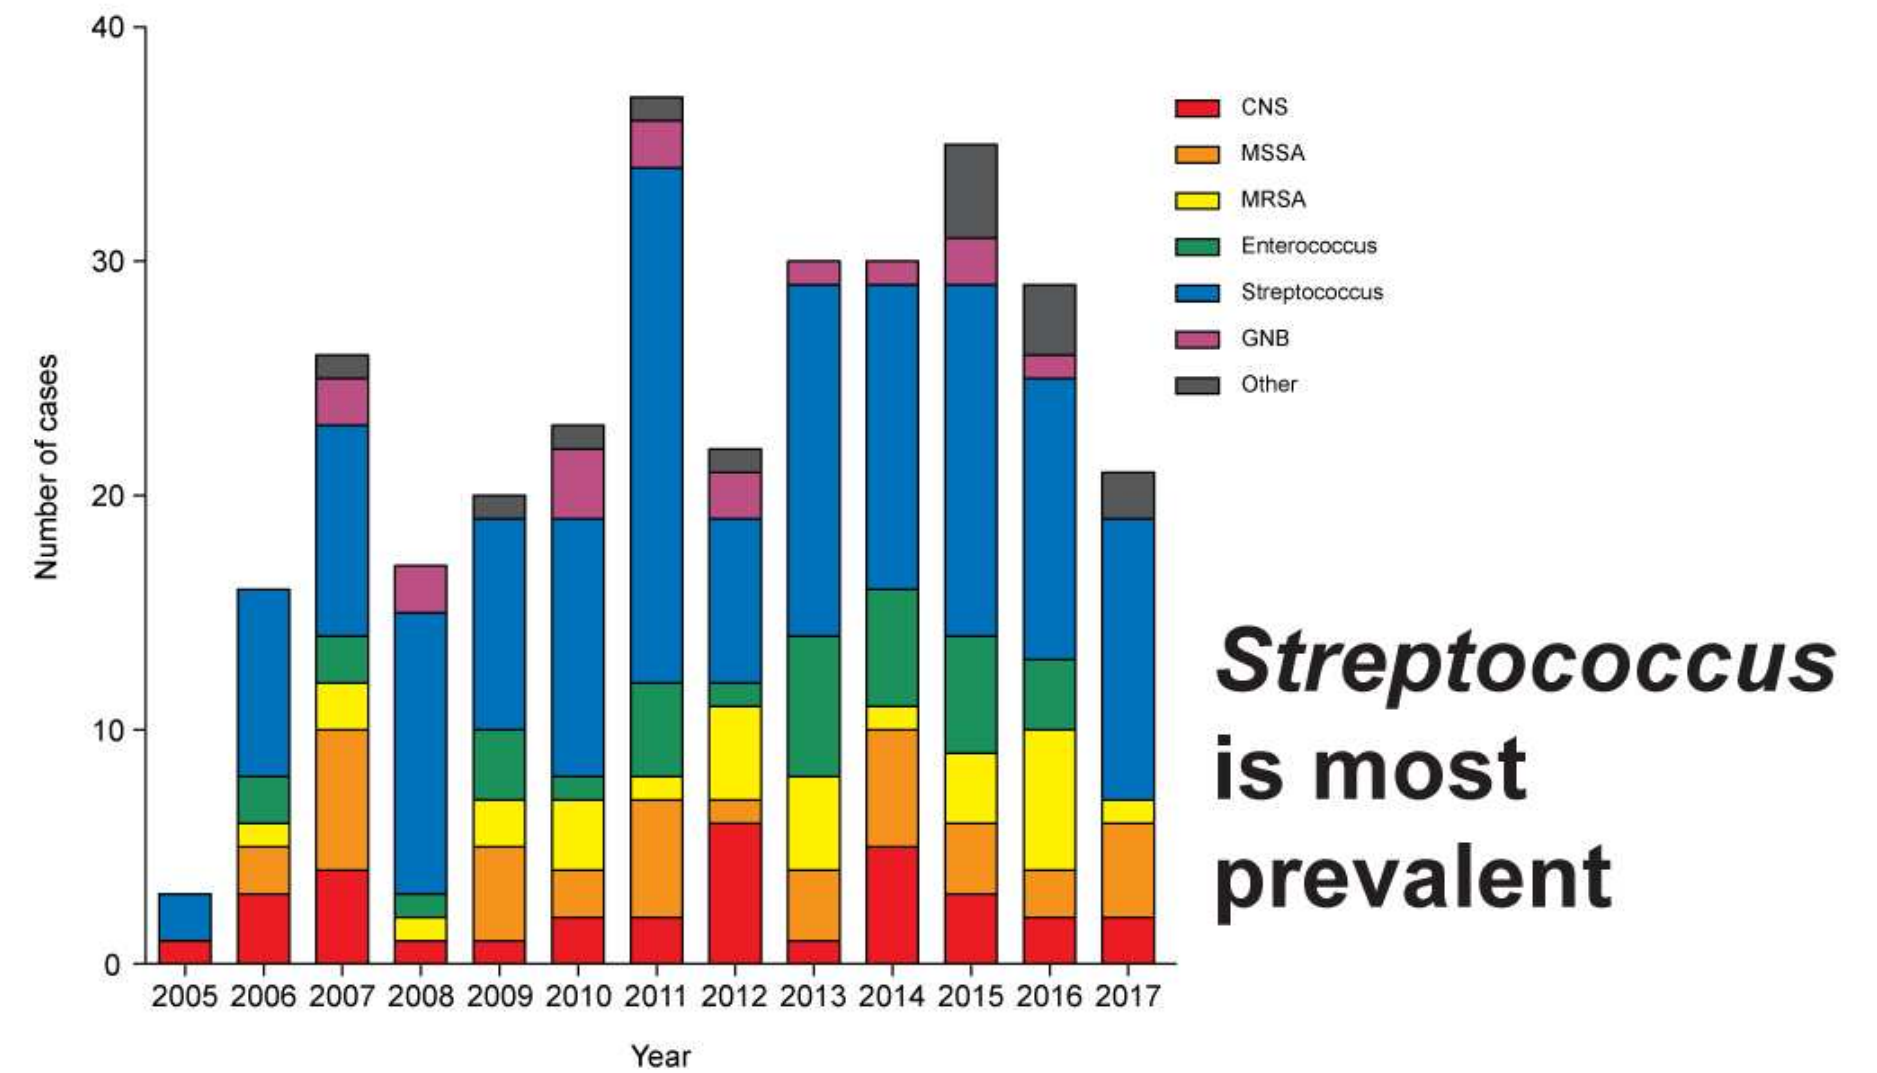

## Factors associated with in-hospital mortality

In-hospital mortality 

In-hospital mortality 

AUC value 83.0 by model comparison

- Staphylococcus aureus
- Aortic valve endocarditis
- Neurologic complication

- A high Charlson comorbidity index
- A high SOFA score

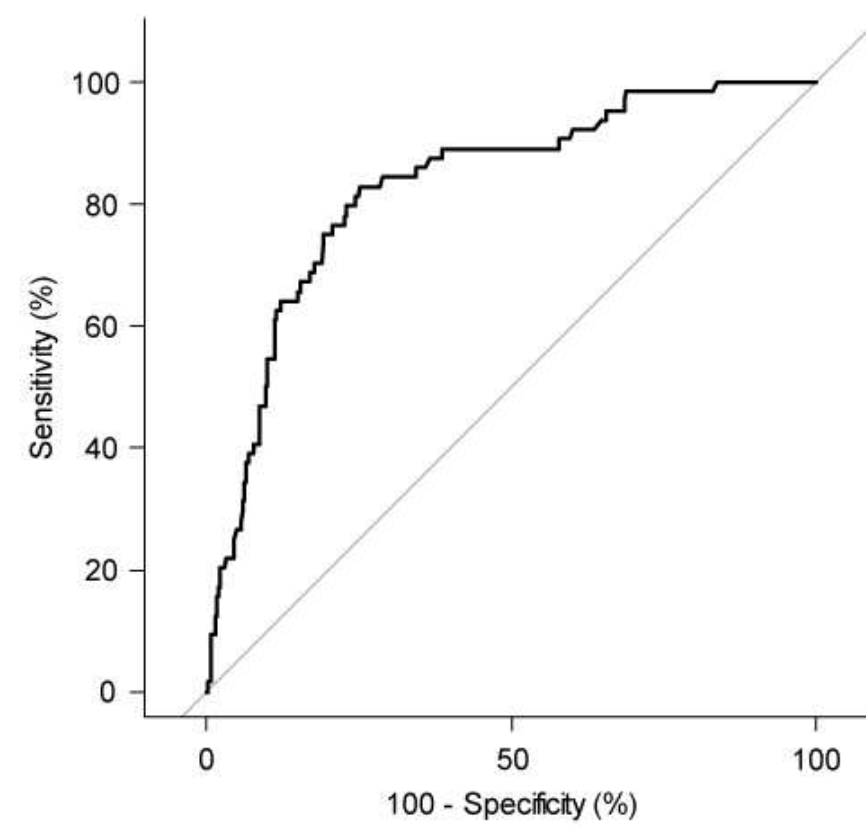

- Surgical intervention

**The protective effect of surgery remained robust after adjustment for other variables**
