# Supplementary figures and images for: Infective endocarditis at a tertiary care hospital in South Korea
Source: PubMed Central journal article supplement — Heart. 2020 Oct 8;107(2):135–41. doi: 10.1136/heartjnl-2020-317265 (PMC7788257; doi:10.1136/heartjnl-2020-317265), 2020-10-08

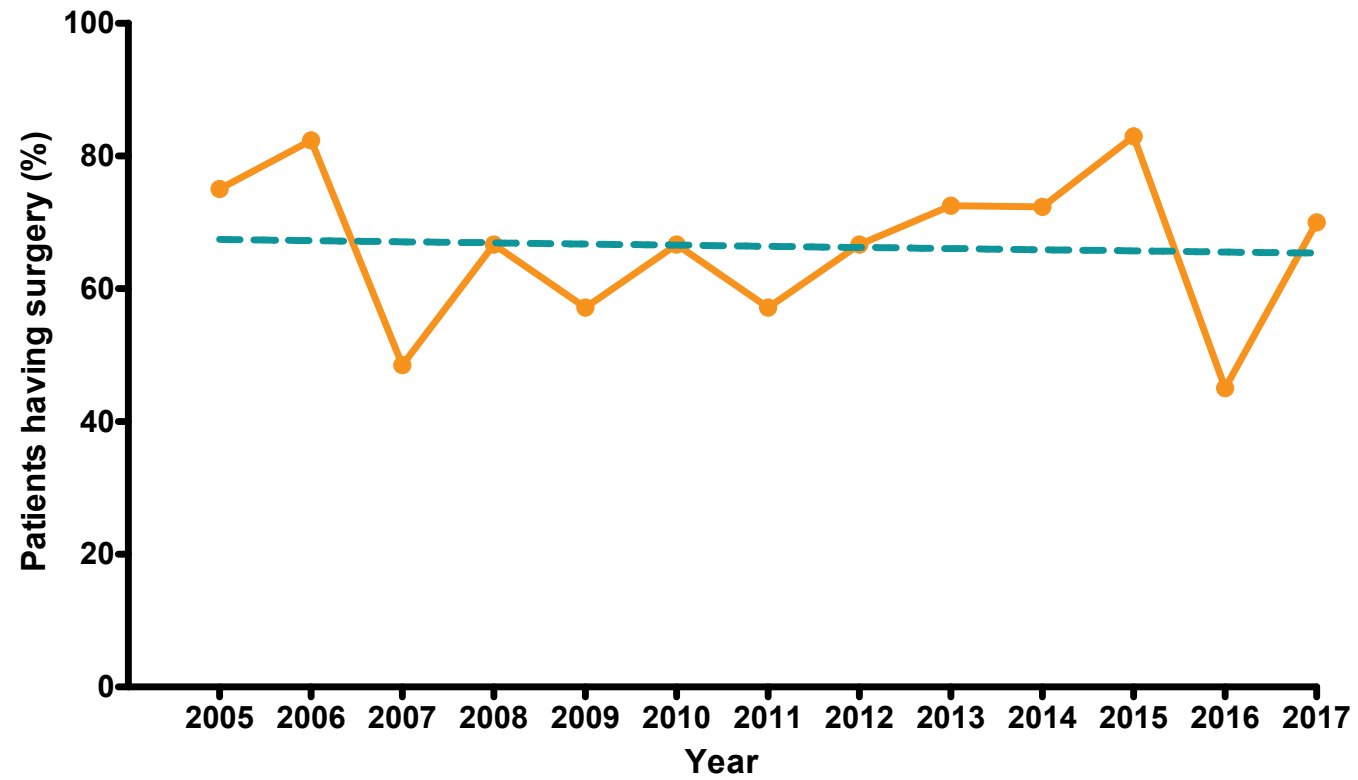

Supplement: heartjnl-2020-317265supp003.pdf [file heartjnl-2020-317265supp003.pdf]

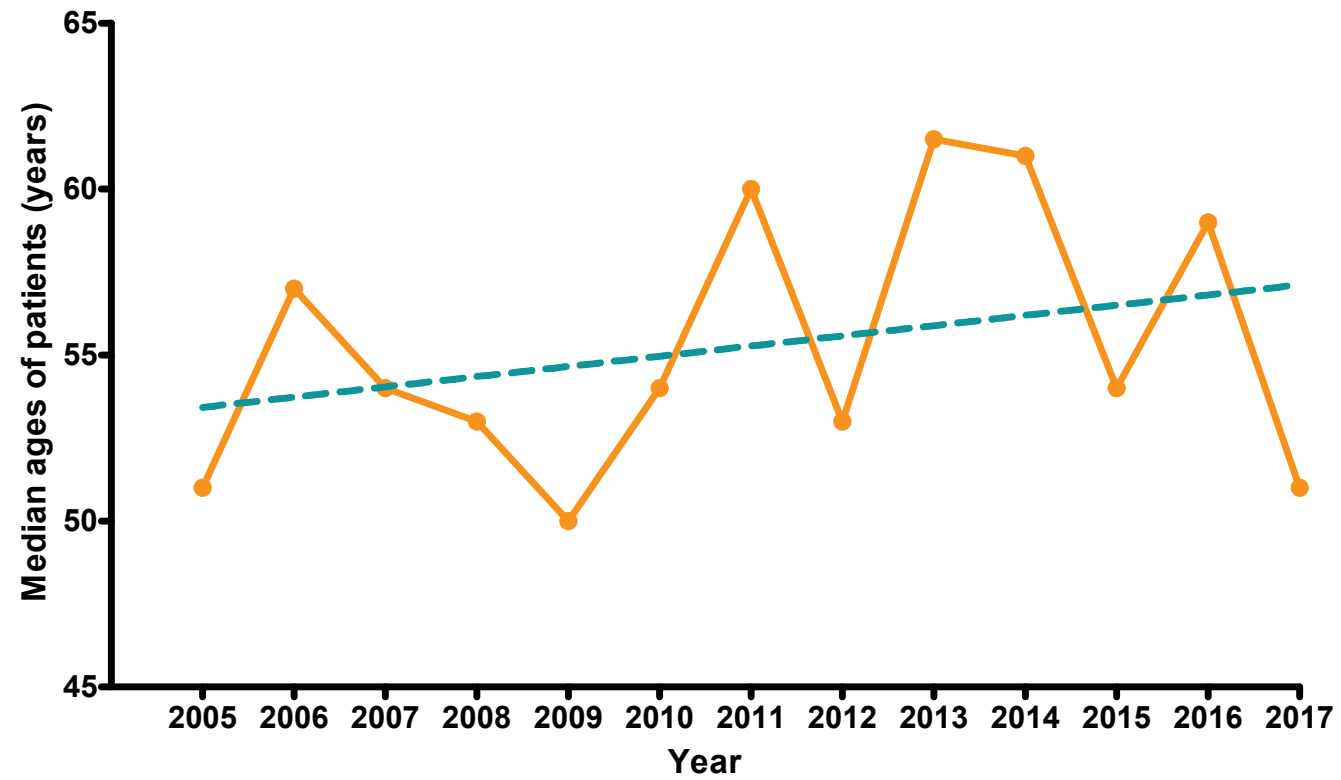

Supplement: heartjnl-2020-317265supp004.pdf [file heartjnl-2020-317265supp004.pdf]
